# Supplementary material for: GENerator of reduced Organic Aerosol mechanism (GENOA v1.0): an automatic generation tool of semi-explicit mechanisms
Source: Copernicus journal article supplement (doi:10.5194/gmd-15-8957-2022), 2022-12-14
Supplement: Supplementary file 1 [file gmd-15-8957-2022-supplement.zip]

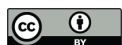

*Supplement of*

## **GENerator of reduced Organic Aerosol mechanism (GENOA v1.0): an automatic generation tool of semi-explicit mechanisms**

**Zhizhao Wang et al.**

*Correspondence to:* Zhizhao Wang ([zhizhao.wang@enpc.fr](mailto:zhizhao.wang@enpc.fr))

- [gmd-15-8957-2022-supplement-title-page.pdf](#)
- [GENOAv1\\_user\\_manual.pdf](#)
- [Properties of condensables in \\_Rdc.\\_ mechanism.xlsx](#)
- [User-chosen reduction options and parameters.xlsx](#)

The copyright of individual parts of the supplement might differ from the article licence.
