# Supplementary material for: GENerator of reduced Organic Aerosol mechanism (GENOA v1.0): an automatic generation tool of semi-explicit mechanisms
Source: Copernicus journal article supplement (doi:10.5194/gmd-15-8957-2022), 2022-12-14
Supplement: Supplementary file 1 [file Properties of condensables in _Rdc._ mechanism.xlsx]

## Sheet: BCARYR6Y_aero
Name of the UNIFAC groups	Index of the UNIFAC in SSH-aerosol/GENOA manual	NBCOOH	C141CO2H	BCKSOZ	C133CO	C132OOH	C131PAN
alkane CH3	0	3	1.89	2.9	0.82	0.0297	2
alkane CH2	1	5	4.69	3.1	1.64	0.0573	4
alkane CH	2	2	1.89	2	0.819	0.017	2
alkane C	3	1	0.945	0.999	0.41	0.0149	1
methanol CH2OH	5		0.0553	0.000524	0.585	0.985
methanol CH2OH	6		0.00069	9.27e-07	0.000309
methanol COH	7		0.000142	0.00053	6.96e-05	0.000302
calcohol between two alcohols OHCH2OH	9		0.000409	2.04e-05	0.000122	0.00121
calcohol between two alcohols OHCHOH	10		0.000272	1.3e-05	0.000122	0.000605
calcohol between two alcohols OHCOH	11		0.00069	6.48e-06	6.1e-05	0.000302
calcohol in tails of alcohol OHCH3OH	12		0.111	0.00134	1.18	2.27
calcohol in tails of alcohol OHCH2OH	13		0.111	0.00234	0.606	3.47
calcohol in tails of alcohol OHCHOH	14		1.05e-05	0.00105	0.01	1.32
calcohol in tails of alcohol OHCOH	15		0.0547	0.000524	0.59	0.985
alkene CH2=C	18	1	1
alkene CH=C	19		5.27e-06
alcohol OH	26		0.0561	0.00105	0.59	0.985
ketone CH3CHO	29		0.992	0.101	0.995	0.696	1
ketone CH2CHO	30		0.124	0.999	2.17	0.669	1
aldehyde CHO	31		0.0142	0.101	0.00542	0.188
ester CH3COO	32				0.0053	0.00375
ether CHO	36			0.899		0.296
carboxylic acid COOH	37		0.939		0.41	0.0189
nitrate CHONO2	40	1
hydroxyperoxide CH2O-OH	42					0.000259
hydroxyperoxide CHO-OH	43					0.168
hydroxyperoxide CO-OH	44	1				0.832
hydroxyperoxide CHO-OC	52			0.899		0.296
peroxyacyl nitrates PAN	54						1
