# Supplementary material for: GENerator of reduced Organic Aerosol mechanism (GENOA v1.0): an automatic generation tool of semi-explicit mechanisms
Source: Copernicus journal article supplement (doi:10.5194/gmd-15-8957-2022), 2022-12-14
Supplement: Supplementary file 2 [file gmd-15-8957-2022-supplement.zip]

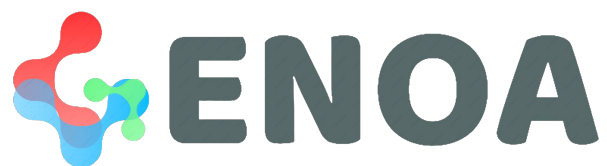

# **GENOA User's Manual**

## **The GENerator of reduced Organic Aerosol mechanism**

Version 1.0

Zhizhao Wang, Florian Couvidat, Karine Sartelet  
[zhizhao.wang@enpc.fr](mailto:zhizhao.wang@enpc.fr)

October 3, 2022

# Contents

|          |                                                 |           |
|----------|-------------------------------------------------|-----------|
| <b>1</b> | <b>Installation</b>                             | <b>3</b>  |
| 1.1      | Requirements . . . . .                          | 3         |
| 1.2      | Download . . . . .                              | 3         |
| 1.3      | Compilation of SSH-aerosol . . . . .            | 3         |
| <b>2</b> | <b>Package Structure</b>                        | <b>4</b>  |
| 2.1      | Chemical mechanism generated by GENOA . . . . . | 6         |
| 2.1.1    | Nomenclature . . . . .                          | 6         |
| 2.1.2    | Folder and file structure . . . . .             | 6         |
| 2.2      | Input files of atmospheric conditions . . . . . | 7         |
| 2.2.1    | Nomenclature . . . . .                          | 7         |
| 2.2.2    | Folder and file structures . . . . .            | 9         |
| <b>3</b> | <b>Running the BCARY reduction</b>              | <b>9</b>  |
| 3.1      | Output structures . . . . .                     | 10        |
| 3.2      | Records file contents . . . . .                 | 12        |
| 3.2.1    | Reduction parameters . . . . .                  | 12        |
| 3.2.2    | Training results . . . . .                      | 13        |
| 3.2.3    | Late-stage reduction . . . . .                  | 13        |
| <b>4</b> | <b>Running your own reduction</b>               | <b>13</b> |
| 4.1      | Configuration Options . . . . .                 | 15        |
| 4.1.1    | Basic settings . . . . .                        | 16        |
| 4.1.2    | Input and output . . . . .                      | 16        |
| 4.1.3    | Settings for testing . . . . .                  | 17        |
| 4.1.4    | Settings for pre-testing . . . . .              | 18        |
| 4.1.5    | Settings for testing . . . . .                  | 20        |
| <b>5</b> | <b>Implementation in air quality models</b>     | <b>21</b> |

## List of Code Listings

|   |                                                                                                        |    |
|---|--------------------------------------------------------------------------------------------------------|----|
| 1 | Compiling SSH-aerosol-GENOA . . . . .                                                                  | 4  |
| 2 | Running BCARY reduction . . . . .                                                                      | 10 |
| 3 | Cleaning the output of the reduction . . . . .                                                         | 12 |
| 4 | An example of the recorded information for one reduction step<br>in <i>CaseRdc_[chem_id]</i> . . . . . | 14 |
| 5 | Basic setting . . . . .                                                                                | 16 |
| 6 | Setting for input and output . . . . .                                                                 | 17 |

|    |                                                                                                       |    |
|----|-------------------------------------------------------------------------------------------------------|----|
| 7  | Settings for training . . . . .                                                                       | 19 |
| 8  | Settings for pre-testing . . . . .                                                                    | 20 |
| 9  | Settings for testing . . . . .                                                                        | 20 |
| 10 | Partial chemical reaction list before and after implementing<br>the reduced "Rdc." mechanism. . . . . | 22 |

This manual is part of the electronic supplement of the article "GENERator of reduced Organic Aerosol mechanism (GENOA v1.0): An automatic generation tool".

## 1 Installation

### 1.1 Requirements

GENOA requires Python 3.5 or later<sup>1</sup>. Please make sure that python3 library NumPy 1.11.0 or later<sup>2</sup> has been appropriately installed, and it can be executed with the command "python3".

Furthermore, GENOA is coupled with the 0-D aerosol model SSH-aerosol<sup>3</sup> [1]. Please read the user's manual<sup>4</sup> of ssh-aerosol v1.2, and make sure all the requirements for SSH-aerosol have been appropriately installed. For the compilation of SSH-aerosol, the construction tool SCONS<sup>5</sup> is required as well.

Optional python3 libraries matplotlib 1.5.1 or later<sup>6</sup> and basemap 1.2.1 or later<sup>7</sup> are required for post-processing the testing results and draw the error map.

### 1.2 Download

All codes and data related to GENOA v1.0 and its application to the reduction of the Beta-caryophyllene mechanism can be downloaded directly from Zenodo<sup>8</sup>. Please find the latest updates of GENOA in github<sup>9</sup>.

### 1.3 Compilation of SSH-aerosol

If the user has no experience with SSH-aerosol, we recommend first trying to compile SSH-aerosol before running GENOA. To do that, please copy the genoa version of SSH-aerosol into a test directory and run the commands in Listing 1 after installing all the requirements for SSH-aerosol. This GENOA version of SSH-aerosol is developed from SSH-aerosol v1.2.1 and has been

---

<sup>1</sup><https://www.python.org/>

<sup>2</sup><https://numpy.org/>

<sup>3</sup><https://sshaerosol.wordpress.com/>

<sup>4</sup>[http://cerea.enpc.fr/ssh-aerosol/user\\_manual.pdf](http://cerea.enpc.fr/ssh-aerosol/user_manual.pdf)

<sup>5</sup><http://www.scons.org/wiki/SconsTutorial1>

<sup>6</sup><https://matplotlib.org/>

<sup>7</sup><https://matplotlib.org/basemap/>

<sup>8</sup><https://doi.org/10.5281/zenodo.6483089>

<sup>9</sup><https://github.com/tool-genoa/GENOA>

adapted to use in GENOA (remove most of the outputs and modify the computation of gas-phase chemistry in order to use different chemical mechanisms).

If SSH-aerosol has been successfully compiled, the user should see the following text by the end of the standard output: *"scons: done building targets."*.

```
1 # copy the GENOA version of SSH-aerosol to the test directory
  ↪ [test]
2 cp -rf GENOA/src/files/ssh-aerosol-genoa [test]/.
3 # go to the ssh-aerosol folder for testing
4 cd [test]/ssh-aerosol-genoa
5 # clean the previous compilation files (if need)
6 ./clean
7 # command to compile SSH-aerosol. If success, the last printed
  ↪ message will be "scons: done building targets.".
8 ./compile
```

Listing 1: Compiling SSH-aerosol-GENOA

## 2 Package Structure

The downloaded package contains three sections: the source code of GENOA, the input data required to run the reduction of Beta-caryophyllene (BCARY) mechanism (generated from the Master Chemical Mechanism (MCM) [2]), and one example reduction result produced with the given input data.

The major folders/files include:

- **GENOA**, the GENOA v1.0 code
  - **src**, the folder contains the source code of GENOA v1.0.
    - \* **files**, the folder contains the files required for generating chemistry files and run SOA simulations.
      - **ssh-aerosol-genoa** the GENOA version of ssh-aerosol
  - **inputs\_bcary**, the folder contains the input files required to run the BCARY reduction (except for the input files for conditions, they are saved separately in another folder *conditions\_bcary*).
    - \* **rdc\_cfg.ini**, the configuration file of GENOA. The configuration options are detailed in Sect. 4.1.

- \* **BCARYorg**, the chemical folder contains the reference mechanism for BCARY reduction generated from the BCARY degradation mechanism of the Master Chemical Mechanism v3.3.<sup>10</sup> (hereafter referred to as the MCM mechanism). In this reference mechanism, very fast degraded species with a kinetic rate coefficient of more than  $1 \text{ s}^{-1}$  have been 'jumped' to avoid numerical stiffness. The structure and usage of the chemical files inside the chemical folder are explained in Sect. 2.1.
- \* **dataset.list**, the testing dataset for the BCARY reduction, where the testing conditions are presented by identifiers explained in Sect. 2.2.
- **examples**, the folder contains files for post-processing.
  - \* **map\_testing.py**, the python script for plotting the error map from the testing result. Python3 libraries *matplotlib* and *basemap* are required to run this script. An example of the generated figure (*Testing\_R6R.png*) is provided.
  - \* **clean.py**, the python script for cleaning the output of GENOA. The use of this file is explained in Listing 3.
- **conditions\_bcary**, the folder contains all the input files related to the atmospheric conditions to run SOA simulations with SSH-aerosol. See Sect.2.2.2 for more information.
- **results\_bcary\_example**, the folder contains the example results generated by GENOA from the BCARY reduction.
  - **CaseRdc\_R**, the record of the entire training process. See more details about the content of the records in Sect. 3.2.
  - **BCARYR6R**, the final reduced SOA mechanism trained with the input data and the given configuration file. This mechanism is reported in the paper as the "Rdc." mechanism.
  - **Testing\_BCARYR6R\_all**, a record of the testing result of the reduced mechanism *BCARYR6R*. The errors of total SOA concentrations between simulations with the reduced mechanism (*BCARYR6R*) and with the reference mechanism (*BCARYorg*) on the testing dataset are listed in this file. This file can be post-processed with the python script *map\_testing.py*.

---

<sup>10</sup><http://mcm.york.ac.uk/MCMv3.3.1>

## 2.1 Chemical mechanism generated by GENOA

### 2.1.1 Nomenclature

During the reduction, for each potential reduction attempt, GENOA will generate a chemical folder under the name of the generated mechanism: *[chem\_name]* (e.g., *inputs\_bcary/BCARYorg*). The name contains **[prefix] + [chem\_id] + [suffix]**.

[prefix] and [chem\_id] are assigned in the configuration file and fixed for the entire reduction. [suffix] is generated automatically in GENOA. For the first to the 62<sup>nd</sup> reduction steps, the suffix is one tail letter from the ASCII letters ('a' to 'z' + 'A' to 'Z', in total 52 letters) and digits (0 to 9, in total 10 letters). After 62 steps, the suffix is built up by one middle letter from digits and one tail letter. A unique suffix is assigned for each reduction step.

For example, in the BCARY reduction ([prefix]="BCARY") with a [chem\_id] of "R" (see *rdc\_cfg.ini*), the reduced mechanism resulted from the first reduction step will be named after *BCARYRa* (suffix: "a"). All the chemical files generated for this mechanism are stored in the chemical folder *BCARYRa*.

Following the same rule, the mechanism resulting from the 63<sup>rd</sup> reduction step is named after *BCARYR0b* (suffix: "0a", 0 is the middle letter, and "a" is the tail letter).

The user should notice that only the latest reduced mechanism of one reduction step is preserved. Meanwhile, the mechanisms with different names can be identical if no reduction attempt is accepted at one or several reduction steps. To backtrack the mechanisms in one reduction step, the user can check the record files for each reduction step.

### 2.1.2 Folder and file structure

The chemical folder contains the following files:

- ***[chem\_name].reactions***, the list of the chemical reactions that is used to run SOA simulations in SSH-aerosol.
- ***[chem\_name].species***, the list of the gas-phase species and their molar weights that are used to run SOA simulations in SSH-aerosol.
- ***[chem\_name].aer.vec***, the list of the aerosol species and their properties that are used to run SOA simulations in SSH-aerosol. The molecular structure of the aerosol species is written as a vector of the number of the UNIFAC functional groups (see Table 1). The saturation vapor pressure is computed from their SMILES structure using UManSysprop<sup>11</sup>.

---

<sup>11</sup><http://umansysprop.seaes.manchester.ac.uk/>

The input henry's law constant is set to zero initially and will be calculated in ssh-aerosol with the input UNIFAC vectors.

- **[chem\_name].R02**, the list of the peroxy radicals (R02) species. Those species build up the so-called R02 pool (referred to as species "R02" in the species list) used to compute R02-R02 reactions.
- **[chem\_name].mol**, the list of all chemical species along with their properties. This file is used to track the reduction details of species in GENOA.
- **[chem\_name].viz**, the file is used to plot the reaction pathways with Graphviz<sup>12</sup>. The file is only generated when the number of aerosols (condensable species) is lower than 20.

## 2.2 Input files of atmospheric conditions

The geographic information, initial/ background concentrations, and meteorological data of the atmospheric conditions are required by SSH-aerosol to run SOA simulations. For BCARY reductions, that information is extracted from CHIMERE simulations [3] and is stored in the directory ("pathInitFiles" in the configuration file).

### 2.2.1 Nomenclature

In GENOA, conditions (i.e., training, pre-testing, and testing datasets) are written in the format  $[X_y, X_x, X_m]$ , where  $X_y$  and  $X_x$  note the location of the condition ( $X_y$  for latitude and  $X_x$  for longitude), and  $X_m$  notes the month (natural month equals to  $X_m+1$ ).

The relationship between identifiers  $X_y$  and  $X_x$  and the coordinates of the conditions are given by two files in the directory "pathInitFiles":

- **latitudes.npy**, a NumPy array file recording the identifier  $X_y$  (the index of the array) and the corresponding latitude of the condition. For the given input data, the range of  $X_y$  is from 0 to 152, corresponding to 32 °N to 70 °N with a step of 0.25 °N.
- **longitudes.npy**, a NumPy array file recording the identifier  $X_x$  (the index of the array) and the corresponding longitude of the condition. For the given input data, the range of  $X_x$  is from 0 to 142, corresponding to 17 °W to 39.8 °E with a step of 0.4 °E.

---

<sup>12</sup><http://viz-js.com/>



| Index | Group name (symbol)                       | Structures                                                                                                                                                                                 |
|-------|-------------------------------------------|--------------------------------------------------------------------------------------------------------------------------------------------------------------------------------------------|
| 0-3   | alkane group (C)                          | CH <sub>3</sub> , CH <sub>2</sub> , CH, C                                                                                                                                                  |
| 4-7   | methanol (C[OH])                          | CH <sub>3</sub> OH, CH <sub>2</sub> OH, CHOH, COH                                                                                                                                          |
| 8-11  | calcohol between two alcohols ([OH]C[OH]) | OHCH <sub>3</sub> OH, OHCH <sub>2</sub> OH, OH-CHOH, OHCOH                                                                                                                                 |
| 12-15 | calcohol in tails of alcohol ([OH]C)      | OHCH <sub>3</sub> , OHCH <sub>2</sub> , OHCH, OHC                                                                                                                                          |
| 16-20 | alpha-olefin group (C=C)                  | CH <sub>2</sub> =CH, CH=CH, CH <sub>2</sub> =C, CH=C, C=C                                                                                                                                  |
| 21,22 | aromatic carbon (AC)                      | AC-H, AC                                                                                                                                                                                   |
| 23-25 | aromatic carbon-alkane (AC-C)             | AC-CH <sub>3</sub> , AC-CH <sub>2</sub> , AC-CH                                                                                                                                            |
| 26    | alcohol (OH)                              | OH                                                                                                                                                                                         |
| 27    | water (H <sub>2</sub> O)                  | H <sub>2</sub> O                                                                                                                                                                           |
| 28    | aromatic carbon-alcohol (ACOH)            | AC-OH                                                                                                                                                                                      |
| 29,30 | ketone (RCO)                              | CH <sub>3</sub> CO, CH <sub>2</sub> CO                                                                                                                                                     |
| 31    | aldehyde (HCO)                            | CHO                                                                                                                                                                                        |
| 32,33 | ester (COO)                               | CH <sub>3</sub> COO, CH <sub>2</sub> COO                                                                                                                                                   |
| 33-36 | ether (COC)                               | CH <sub>3</sub> O, CH <sub>3</sub> O, CHO                                                                                                                                                  |
| 37    | carboxylic acid (COOH)                    | COOH                                                                                                                                                                                       |
| 38    | aromatic nitro (ACNO <sub>2</sub> )       | AC-NO <sub>2</sub>                                                                                                                                                                         |
| 39-41 | nitrate (NO <sub>3</sub> )                | CH <sub>2</sub> ONO <sub>2</sub> , CHONO <sub>2</sub> , CONO <sub>2</sub>                                                                                                                  |
| 42-44 | hydroxyperoxide (CO-OH)                   | CH <sub>2</sub> O-OH, CHO-OH, CO-OH                                                                                                                                                        |
| 45-53 | peroxide (CO-OC)                          | CH <sub>3</sub> O-OCH <sub>2</sub> , CH <sub>3</sub> O-OCH, CH <sub>3</sub> O-OC, CH <sub>2</sub> O-OCH <sub>2</sub> , CH <sub>2</sub> O-OCH, CH <sub>2</sub> O-OC, CHO-OCH, CHO-OC, CO-OC |
| 54    | peroxyacyl nitrates (PAN)                 | PAN                                                                                                                                                                                        |
| 55    | Peroxyacetyl acid (C(O)OOH)               | COOOH                                                                                                                                                                                      |

Table 1: The UNIFAC Structural Groups and its corresponding vector index in SSH-aerosol. This vector is recorded in file *[chem\_name].aer.vec*.

The detailed information for each condition is stored in the subdirectory under the name "m[X<sub>m</sub>]/y[X<sub>y</sub>]/x[X<sub>x</sub>]", where [X] is the index of the corresponding identifier.

In the outputs files, the conditions are also recorded in another format, "m[X<sub>m</sub>]y[X<sub>y</sub>]x[X<sub>x</sub>"] . When with the suffix "\_[#]h", it means that the simulations start at [#] hour.

### 2.2.2 Folder and file structures

By default, GENOA will automatically load the information from the directory "pathInitFiles" to run SOA simulations with SSH-aerosol (by altering the namelist, the configuration file of SSH-aerosol). With loaded identifiers from *dataset.list* (or from the configuration file for the training dataset), GENOA searches the input files of one condition (identifier is [X<sub>y</sub>,X<sub>x</sub>,X<sub>m</sub>]) from the subdirectory m[X<sub>m</sub>]/y[X<sub>y</sub>]/x[X<sub>x</sub>].

The input files include:

- **init\_gas\_[#]h.dat**, the initial gas-phase concentration for simulations starting at [#] hour. In the given package, concentrations at 0 h and 12 h are provided for simulations starting at midnight and noon.
- **init\_aero\_[#]h.dat**, the initial aerosol concentration for simulations started at [#] hour.
- **gas.cst**, the hourly concentration profiles of gas-phase species. The concentration variations of the species recorded in this file are not simulated with SSH-aerosol, as the mechanisms used do not include the inorganic reactions. During the simulations, GENOA uses the concentrations of those species from the hourly input profiles recorded in this file.
- **aero.cst**, the hourly concentration profiles of aerosol species. The same use as *gas.cst* but for aerosol species.
- **meteo.dat**, the file contains the meteorological information (i.e., the temporal profiles of the relative humidity and the temperature (K)).

## 3 Running the BCARY reduction

To run the BCARY reduction with the predefined configuration file *rdc\_cfg.ini* ([*chem\_id*]: "R"), the user just needs to execute the commands option I or II in the Listing 2. Since one BCARY reduction may take a few days, we

recommend using the command `nohup` (option II), which allows the user to run the reduction in the background. Please reserve at least 5 GB of storage for the simulations.

Please be aware that due to the influence of numerical noise on SOA concentration, identical inputs may result in different reduced mechanisms with GENOA when training with different computers (or different version compilers). To exactly reproduce the reported "Rdc." mechanism (*BCARYR6R*), one may need to perform the reduction with Ubuntu 16.04.6 LTS<sup>13</sup>, along with gFortran 5.4.0 and gcc 5.4.0.

```
1 # go to the src folder
2 cd GENOA/src
3 # option I: not use the nohup command
4 python3 __init__.py ../inputs\_bcary/rdc\_cfg.cfg
5 # option II: use nohup: recommended
6 # the printed message will be stored in the file nohup.out
7 nohup python3 __init__.py ../inputs\_bcary/rdc\_cfg.cfg &
```

Listing 2: Running BCARY reduction

### 3.1 Output structures

After starting the reduction, the output folder named ***rdc*** will be generated automatically. All files related to the reduction will be stored in this directory once it is generated. The output folder *rdc* contains the following folders/files:

- ***chems***, the folder contains all the chemical mechanisms and the records generated from the reduction. This directory is assigned by "path-NewChem" in the configuration file.
  - ***CaseRdc\_[chem\_id]***, the file that records all the validated reductions. The content of the record is explained in Sect. 3.2.
  - ***[chem\_id]\_chems***, the folder contains the details of the generated chemical mechanisms.
    - \* ***Testing\_[final\_chem\_name]\_all***, the record of the testing results of the final reduced mechanism [final\_chem\_name]. This file is only generated during the GENOA testing process.

<sup>13</sup><http://old-releases.ubuntu.com/releases/16.04.6/>

- **[chem\_id]\_recs**, the folder contains the details records for each reduction step, including the changes in the mechanism, reduction parameters, and the SOA simulation results (shown in error) for each condition. The record per reduction step is named after "Record\_" + [chem\_name] + "\_[strategy]" + "\_all" and "Record\_" + [chem\_name] + "\_[strategy]" + "\_use", where the file with "\_all" records all the reduction attempt and with "\_use" only records the validated reduction attempts. The strategy name uses abbreviation listed in Table 2.
- **SSHs**, the folder contains the GENOA version of SSH-aerosol models that are used in GENOA reduction. This directory is assigned by "pathSSH" in the configuration file. Generally, for one reduction, GENOA will automatically generate two SSH-aerosol models: one is for running the reduced mechanism, and the other is for running the reference mechanism during pre-testing and testing. This path is assigned by "pathNewChem" in the configuration file. A [ssh\_id] is defined by the user in the configuration file, which is used to assign the name of the SSH-aerosol folders:
  - **[ssh\_id]\_rdc**, the SSH-aerosol folder where GENOA simulates SOA concentrations with the reduced mechanism.
  - **[ssh\_id]\_ref**, the folder SSH-aerosol where GENOA simulates SOA concentrations with the reference mechanism.
  - \* **ref**, a folder contains all the total SOA concentrations simulated by the reference mechanism.
- **smls**, the folder contains the files related to SSH-aerosol simulations (SOA concentrations, namelists, log files) on training dataset. This directory is assigned by "pathNewRes" in the configuration file.
  - **Results\_[chem\_name]**, the folder contains the total SOA concentrations and the ssh-aerosol namelists. This folder is generated from each validated reduction step.
  - **Results\_[ref\_chem\_name]FA**, the folder contains the SSH-aerosol results simulated with the reference mechanism under the complete mode, where the concentrations of each species are recorded. The produced concentrations of radicals are also recorded under the name "FA"+[radical\_name]. This reference mechanism, where the production of radicals is noted, is referred to as the fake mechanism ("IDchemFake") in GENOA. And the path to the SOA simulations results of the fake mechanism under the complete mode of SSH-aerosol is noted as "fakePath".

A python script *clean.py* is provided to help the user clean the output files/folders. One can use the command in Listing 3 to run the cleaning process (remove most of the output files), after modifying the option in the script.

| Strategy Name                      | Abbr. |
|------------------------------------|-------|
| removing reaction                  | rm    |
| removing elementary-like reaction  | rm1   |
| lumping                            | lp    |
| replacing                          | rp    |
| jumping                            | jp    |
| removing species                   | rs    |
| removing gas-particle partitioning | da    |

Table 2: Reduction strategies: names and abbreviations

```

1 # go to the src folder
2 cd GENOA/src/
3 # run the script with the applied configuration file
4 python3 ../examples/clean.py ../inputs_bcary/rdc_cfg.ini

```

Listing 3: Cleaning the output of the reduction

## 3.2 Records file contents

The total record file *CaseRdc\_[chem\_id]* tracks the entire reduction process. After each reduction step, GENOA will write down the reduction information as shown in Listing 4.

### 3.2.1 Reduction parameters

Generally, the record includes the major reduction parameters: the applied reduction strategy (line2), the name and the path to the reference mechanism ("IDchemRef" and "refPath") and the previously validated mechanism ("IDchemPre" and "prePath"), and the error tolerance for evaluating the reduction ("err\_ref" and "err\_pre"), the number of reduction step and stage (1 for late-stage I and 2 for late-stage II.). For the reduction via removing reaction, the threshold of branching ratio is also recorded (line 7). After each validated reduction, the previously validated mechanism will be updated automatically.

### 3.2.2 Training results

For each reduction step, the changes in the size of the mechanism as long as the pre-testing results are displayed. Before the first reduction step, the size of the chemical mechanism (in terms of the number of reactions/ gas-phase species/ condensable species (noted as aerosols)) and the pre-testing results (line 8 and 9) of the previously validated mechanism are recorded. Additionally for the reduction via removing elementary-like reduction, the chemical scheme written with one product before reduction is also given, where the number of reactions increases.

After reduction, the chemical scheme (line 13) and the pre-testing results (line 23) are recorded per reduction step. All the validated reduction is listed out in the record (from line 15).

For pre-testing, "err loc" is the condition simulated with the maximum error, "err max" is the maximum error, "err ave" is the average error, and "err ave max" is the maximum average errors simulated at different starting times. The more differences between "err ave" and "err ave max", the mechanism introduces more errors at one period of simulation.

### 3.2.3 Late-stage reduction

In the last stage of reductions (late-stage I and late-stage II), extra information is recorded in order to help the user choose the best reduction or adjust the user-chosen parameters for further reductions. The chemical scheme (e.g., [29, 14, 5] in line 10 for the number of [reactions, gas, aerosols]) and the pre-testing results of the tested reduction attempt are recorded, along with the tolerance. A keyword "Sim" is noted for the reduction attempts that have passed the evaluation on the training dataset, while another keyword "NoSimCuzNaer" is applied to the reduction attempts that bypass the evaluation on the training dataset as a result of the aerosol-oriented reduction. If the reduction attempt is accepted in the pre-testing, the record line will end with "refuse: 0". Otherwise, it will end with "refuse: 1".

## 4 Running your own reduction

With the provided input data, the user can run their own BCARY reductions with customized configuration options introduced in Sect. 4.1.

To run the reduction on other chemical mechanisms, the user needs to prepare:

- The reference chemical mechanism (e.g., *BCARYorg*). The user can contact the author to generate the reference mechanism with the following

```

1 =====
2 Training. Reduction strategy: Removing reactions
3 IDchemPre: BCARYorgP      prePath:
   ↳ GENOA/rdc/smls/R/Results_BCARYorgP
4 IDchemRef: BCARYorg      refPath:
   ↳ GENOA/rdc/smls/R/Results_BCARYorg
5 Error Tolerance: err_ref <= 0.010000, err_pre <= 0.010000.
6 Current reduction step: 1 with tail: R. Reduction stage: 0
7 Branching ratio for removing reactions: 0.050000      nBRT: 0
8 Initial scheme No.reaction: 1241      No.gas:
   ↳ 493      No.aerosol: 356
9 Pre-Testing on IDchemPre BCARYorgP: err loc: m4y25x33      err
   ↳ max: 0.0007      err ave: 0.0000      err ave max:
   ↳ 0.0000
10 NoSimCuzNaer      [29, 14, 5]      err loc:
   ↳ m11y50x27      err max: 0.2644 <= 0.2000      err ave:
   ↳ 0.0694 (0.0591) <= 0.0300      refuse: 1
11 Sim      [29, 15, 6]      err loc: m11y50x27      err max:
   ↳ 0.1738 <= 0.2000      err ave: 0.0324 (0.0306) <=
   ↳ 0.0300      refuse: 1
12 END, total run: 115 times, valid run: 110
13 Current scheme No.reaction: 1094      No.gas:
   ↳ 473      No.aerosol: 339
14 -----
15 Valid:
16 C024C4CHO + N03 -> C02C3C03 + C0 //
17 + HN03
18 %KNO3AL*5.5
19 KINETIC ARR2 7.700E-12 1860.00
20
21 ...
22
23 Pre-Testing IDchem BCARYRa: err loc: m11y50x27      err max:
   ↳ 0.0082      err ave: 0.0018      err ave max: 0.0023
24 No.reduced      1      No.round      1      Used time:
   ↳ 2480.7
25 =====

```

Listing 4: An example of the recorded information for one reduction step in *CaseRdc\_*[chem\_id]

information (\* indispensable):

- The reaction list\*, containing species names and kinetic rates. The file in SPACK<sup>14</sup> format or KPP<sup>15</sup> format is favourable.
- The species list, containing species name\*, chemical formula, molecular structures\* (in SMILES format or the vector format shown in Table 1), and molecular weight\*. For condensable species, please also provide the saturation vapor pressure, enthalpy of evaporation, and other information that is required in the aerosol species list *[chem\_name].aer.vec*.
- The input files of involved atmospheric conditions (training, pre-testing, and testing conditions). Please update both the input files and the identifiers to the dataset. For example, to run GENOA over a specific domain and using specific 3-D model results, the user has to construct the files described in section 2.2.2 to provide the monthly profiles for the different variables.
- The configuration file for GENOA.

It should be noted that reduced mechanisms may cause large errors when there is a low SOA concentration. The reason might not be directly linked to reduction of the mechanism performance, but to the evaluation criterion, based on relative errors, which naturally has large variations when the absolute value is small. There are several solutions to resolve this uncertainty:

- The user can set high initial concentrations of the studied SOA precursor in order to ensure high SOA production.
- The user may specify a threshold SOA concentration for condition selection in the training and pre-testing datasets.
- The user may also evaluate reductions using a different type of error.

## 4.1 Configuration Options

The configuration file contains the essential reduction parameters/ options that the user can change to run their own reductions.

---

<sup>14</sup><https://www.cerea-lab.fr/dossiers/racine/articles/guide-0.pdf>

<sup>15</sup><https://people.cs.vt.edu/asandu/Software/Kpp/>



#### 4.1.1 Basic settings

As shown in Listing 5, the chemical ID ("IDchem", or [chem\_id] in the previous text), prefix for the chemical file ("prefix"), and a list of the primary VOCs in the mechanism ("primaryVOCs") are listed in the group [chemistry\_id].

For each reduction, a unique "IDchem" should be assigned in the configuration file in order to avoid confusion with other reductions. The SOA precursors recorded in "primaryVOCs" will not be removed from the scheme or merged with other species.

In the group [action], the flag "training" is activated for running the training process, while the flag "testing" is activated to run the testing process. If the flag is on, please check the group under the same name to ensure the inputs have been updated.

```
1  [chemistry_id]
2  # suffix of the chemical scheme name
3  IDchem = 'R'
4  # prefix to save results
5  prefix = 'BCARY'
6  # name of the precursor
7  # should be consistent with the name in the initial file
8  primaryVOCs = ['BCARY']
9
10
11 # True/False to active the corresponding section
12 # update if only active
13 [action]
14 # 1 for on and 0 for off
15 # Set both training and testing at 1: reduction is on
16 training = 1
17 testing = 1
```

Listing 5: Basic setting

#### 4.1.2 Input and output

The groups [input] and [output] shown in Listing 6 allow the user to change the input data and the output repositories for the reduction.

"namelist\_pre" is the default namelist used for SOA simulations with SSH-aerosol. For each simulation, a namelist will be generated based on this file with updated meteorological data, starting simulation time, initial/ back-

ground concentration files, and output directory. The rest of the parameters from the default namelist are used in the simulations.

"pathInitFiles" is the path to the initial files of the atmospheric conditions. "speciesfile" is the path to the *[chem\_name].mol* file of the reference mechanism.

"pathSSH", "pathNewChem", and "pathNewRes" are the three output directories, which are used to run SOA simulations with SSH-aerosol, store the generated chemical mechanisms, and store SSH-aerosol outputs (mainly the total SOA concentrations and namelists) of the validated reduced mechanisms on the training dataset, respectively.

```
1  [input]
2  # the default namelist used in ssh-aerosol-genoa.
3  namelist_pre = 'namelist_ssh'
4  # path to initial concentrations. Folders ordered by
   ↪ m[X_m]/y[X_y]/x[X_x]/
5  # all input files are extracted from CHIMERE
6  pathInitFiles = '../..../conditions_bcary/'
7  # species properties in the reference chemical mechanism.
   ↪ Generated by GENOA
8  speciesfile = '../inputs_bcary/BCARYorg/BCARYorg.mol'
9
10 [output]
11 # directory to ssh-aerosol
12 # generate two folders [pathSSH]+'_rdc' [pathSSH]+'_ref' for
   ↪ reduction
13 pathSSH = '../rdc/SSHs/R'
14 # directory to save generated chemical mechanisms
15 pathNewChem = '../rdc/chems'
16 # directory to save SSH-aerosol simulation results on training
   ↪ dataset
17 pathNewRes = '../rdc/smls'
```

Listing 6: Setting for input and output

#### 4.1.3 Settings for testing

If the flag in group [action] "training" is activated, GENOA will run the training process with the setting in the group [training] noted in Listing 7. The training dataset, is assigned by "locs" in the group [conditions].

Two options are provided to run the training process: option I is to run one reduction from the beginning, and option II is to run one reduction from

a breakpoint. For a new reduction, one should always start from option I, activating "from\_ref" (= 1), "IDchemRef", and "refChemPath" (the chemical name, and the path to the folder that contains the reference mechanism).

Option II can be used if the user has already the chemical mechanism and the SOA simulation results on the training dataset of the previously validated mechanism (name: "IDchemPre", the path to the mechanism: "preChemPath", and the path to SOA simulation results: "prePath") and the fake mechanism (name: "IDchemFake", and path to the SOA simulation results (under the complete mode of SSH-aerosol): "fakePath").

The reduction strategies applied to the reduction are read from their abbreviations (see Table 2) by the list "strategy\_types". If the strategy of removing elementary-like reactions ("rm1") is not in "strategy\_types", after traversing all possible reductions with the provided strategies with the last pair of error tolerance, GENOA will automatically add "rm1" after removing reactions ("rm") for further reduction.

"BranchRatio" lists the thresholds of the branching ratios used for the reduction via removing reaction. This list should be in the ascending order with a maximum value not larger than 1 (try to remove all reactions one by one). Currently, "BranchRatio" is initialized with [5E-2, 1E-1, 5E-1]. When the error tolerance err\_ref reaches 0.03, "BranchRatio" is increased to [1E-1, 5E-1, 1], while "BranchRatio" is set to [1.] for the late reduction stages and for reduction via removing elementary-like reaction.

"err\_ref" and "err\_pre" are the error tolerances used to compare the SOA simulation results on training dataset simulated with the reduced mechanism to the ones simulated with the reference mechanism ("IDchemRef") and with the previous validated mechanism ("IDchemPre"), respectively.

#### 4.1.4 Settings for pre-testing

The settings for pre-testing is displayed in Listing 8, where "nPreTest" is the number of pre-testing conditions. GENOA will read the pre-testing conditions from the beginning of the list of the testing dataset ("Test\_file" in-group [testing], from the first condition to the "nPreTest" number of conditions.

"try\_at\_err" is the "err\_ref" value at which GENOA needs to activate the restrictions on pre-testing results. That means after "err\_ref" reaches "try\_at\_err", GENOA will run the pre-testing simulation after each reduction attempt that has been accepted in the evaluation with the training dataset. The reduction that exceeds the error tolerances of pre-testing will be refused. For efficiency, "try\_at\_err" for BCARY reduction is set at 0.04. When "try\_at\_err" is larger than "try\_ave\_ref", the user should make sure the average error of pre-testing (the pre-testing results are monitored per reduction step) before adding the

```

1  [conditions]
2  # training dataset
3  locs = [[55, 65, 11],[0,19,6],[33, 34, 6],
4  ↪      [38,7,11],[148,127,0],[144,88,11],[0,134,7],[16,81,6]]
5  [training]
6  # Option I: active from_ref IDchemRef refChemPath
7  # pre chem (IDchemPre,preChemPath,prePath) and
8  # fake chem (IDchemFake,fakePath) are generated automatically
9  from_ref = 1
10 IDchemRef = 'BCARYorg'
11 refChemPath = '../inputs_bcary'
12
13 # Option II: run reduction from a break point
14 # pre chem
15 #IDchemPre = 'BCARYorgP'
16 #preChemPath = '../rdc/chems/R_chem'
17 #prePath = '../rdc/smls/R/Results_BCARYorgP'
18 # ref chem
19 #IDchemRef = 'BCARYorg'
20 #refChemPath = '../rdc/chems/R_chem'
21 #refPath = '../rdc/smls/R/Results_BCARYorg'
22 # fake chem
23 #IDchemFake = 'BCARYorgFA'
24 #fakePath = '../rdc/smls/R/Results_BCARYorgFA'
25
26 # reduction_strategies
27 strategy_types = ['rm','rp','lp','jp','rs','ra']
28
29 # used for removing reaction
30 BranchRatio = [5E-2, 1E-1, 5E-1]
31
32 # error tolerance compared to ref case
33 err_ref =
34 ↪      [0.01,0.02,0.02,0.03,0.03,0.03,0.04,0.04,0.06,0.06,0.08,0.08,0.10,0.10]
35 # error tolerance compared to pre case
36 err_pre =
37 ↪      [0.01,0.01,0.02,0.01,0.02,0.03,0.02,0.04,0.04,0.06,0.04,0.08,0.08,0.10]

```

Listing 7: Settings for training

restriction is no more than "try\_ave\_ref".

The error tolerances for adding the restrictions on pre-testing results are assigned by the average error "try\_ave\_ref" and the maximum error "try\_max\_ref" compared to the reference mechanism. Due to the aerosol-oriented treatment in the late reduction stages, the error tolerance will be larger for reductions that reduce the number of aerosols. (0.01 larger on "try\_ave\_ref" and 0.10 larger on "try\_max\_ref".)

```
1 # setting for pre-testing
2 # err_ref at which to start the evaluation on pre-testing
3 try_ave_ref = 0.03
4
5 # max err allowed on pre-testing conditions
6 # an exceed of 0.10 is allowed if number of
7 # aerosol is reduced in the late stage of reduction (No.aer <= 20)
8 try_max_ref = 0.20
9
10 # number of pre-testing conditions (0-nPreTest) selected from
11   ↪ testing dataset
12 nPreTest = 150
```

Listing 8: Settings for pre-testing

#### 4.1.5 Settings for testing

Finally, for the testing process, the flag "testing" in group [action] needs to be activated. "Test\_file" is the list of testing dataset. The record file for testing will be generated in the directory "pathNewChem"+[chem\_id]+"\_chems", named after *Testing\_[chem\_name]\_all*.

```
1 [testing]
2 # list of testing dataset
3 # ../../conditions_bcary/
4 Test_file = '../inputs_bcary/dataset.list'
```

Listing 9: Settings for testing

## 5 Implementation in air quality models

The reduced SOA mechanisms trained from GENOA contain the gas-phase chemical reactions and the detailed properties for condensable species (e.g., saturation vapor pressure, the molecular structures in terms of UNIFAC structural groups), which can be implemented directly into existing 3-D models.

However, the implementation has only to be done in a way that does not affect the formation and degradation of non-GENOA species. In other words, oxidant, radical, and other inorganic concentrations should not be modified by the added mechanisms.

As GENOA has been coupled with the aerosol formation model SSH-aerosol [1], which is already coupled to several 3-D models (e.g., [4] and [5]), the coupling of the semi-explicit mechanisms in 3-D models can be achieved using SSH-aerosol directly.

Reduced SOA mechanisms can also be manually implemented in any air quality model by the user, which requires replacing or adding species (with necessary properties, such as saturated vapor pressure and functional group decomposition) and reactions (without changing the concentrations of main radicals and oxidants) to existing model mechanisms. A total RO<sub>2</sub> concentration should also be calculated in order to calculate RO<sub>2</sub>-RO<sub>2</sub> reaction rates.

An example of implementing the "Rdc." mechanism in a 3-D model is shown in Listing 10, where "Rdc." is added to the implicit gas-phase mechanism cb05 [6] + implicit SOA mechanism H<sup>2</sup>O [7] currently embedded in SSH-aerosol and the 3-D chemical transport model CHIMERE.

As we can see, the "Rdc." reaction list is added to the reaction list of cb05 + H<sup>2</sup>O, and the concentration of O<sub>3</sub> and OH are not modified with "Rdc.". In the H<sup>2</sup>O mechanism, the degradation of the sesquiterpene (as the surrogate "HUM") leads to two condensable species BiBmP and BiBIP. The formation of these two condensables is replaced by the production of six new "Rdc." aerosols (their properties, such as saturation vapor pressure and activity coefficient, should be added correspondingly as well).

In particular, the user should notice that a special treatment is required for peroxy radicals (RO<sub>2</sub>), whose concentrations are used to calculate the kinetics of their self- and cross-reactions. In the reduced mechanism (same as in MCM), RO<sub>2</sub> concentrations referred to as the "RO<sub>2</sub> pool", are divided into two parts based on the source of RO<sub>2</sub>: the RO<sub>2</sub> concentrations from the reduced SOA mechanisms (the sum of all RO<sub>2</sub> derived from treated SOA precursors), and the background RO<sub>2</sub> concentrations from other mechanisms (gas-phase inorganic reactions and RO<sub>2</sub> from other SOA mechanisms).

In the example, the RO<sub>2</sub> species "XO<sub>2</sub>" (with reaction in line 11) is divided

```

1      %%% Previous in cb05 + H2O:
2      % in the SPACK formation used in SSH-aerosol
3
4      % An example of sesquiterpene degradation in H2O
5      HUM + OH -> 0.75 H02 + 1.25 X02 + 0.25 X02N + //
6              0.28 FORM + 1.66 PAR + 0.47 ALDX + //
7              0.74 BiBmP + 0.26 BiBlP
8      KINETIC ARR1      2.93E-10
9
10     % An example of R02 inorganic reaction with NO
11     X02 + NO -> N02
12     KINETIC ARR2 2.6E-12 -365.0
13
14     %%% After implementing the reduced SOA mechanism, the new
15     ↪ cb05 + H2O + GEN0A mechanism should:
16
17     % Preserve the destruction and production of inorganics in
18     ↪ the implicit gas-phase mechanism
19
20     HUM + OH -> 0.75 H02 + 1.25 hum-X02 + 0.25 X02N + //
21             0.28 FORM + 1.66 PAR + 0.47 ALDX //
22
23     % Add the reduced SAO mechanism (BCARY is replaced with the
24     ↪ sesquiterpene surrogate HUM)
25
26     HUM + OH -> mBCSOZ + OH
27     KINETIC ARR1 1.97E-10
28
29     HUM + O3 -> 0.874 BCB00 + 0.111 mBCAL02 + O3
30     KINETIC ARR1 1.19E-14
31
32     % R02-R02 reaction in Rdc.
33     mBCAL02 -> 0.6 mC131C03
34     % the R02 concentrations are the sum of all sesquiterpene R02
35     ↪ (from Rdc.) and the background R02 (from inorganic
36     ↪ reactions and other VOC mechanisms. e.g., X02)
37     KINETIC TB R02 ARR1 1.711E-11
38
39     ... % other BCARY SOA reactions
40
41     % Rewrite R02 inorganic reaction (Do not double count R02
42     ↪ concentrations from different mechanisms)
43     X02 + NO -> N02
44     KINETIC ARR2 2.6E-12 -365.0
45
46     hum-X02 + NO -> N02
47     KINETIC ARR2 2.6E-12 -365.0

```

Listing 10: Partial chemical reaction list before and after implementing the reduced "Rdc." mechanism.

into "XO2" and "hum-XO2" (present RO2 from sesquiterpene) in the new mechanism to avoid counting the RO2 concentrations twice. The presence of "HUM-XO2" is only to keep the previous radical reactions unchanged, which does not take into account in calculating the kinetic rates of "Rdc." RO2-RO2 reactions. For consistency, all the inorganic reactions of "XO2" should also be written as the reactions with "hum-XO2" (reaction in line 40).

## References

- [1] K. Sartelet, F. Couvidat, Z. Wang, C. Flageul, and Y. Kim, "Ssh-aerosol v1. 1: A modular box model to simulate the evolution of primary and secondary aerosols," *Atmosphere*, vol. 11, no. 5, p. 525, 2020.
- [2] M. Jenkin, K. Wyche, C. Evans, T. Carr, P. Monks, M. Alfarra, M. Barley, G. McFiggans, J. Young, and A. Rickard, "Development and chamber evaluation of the mcm v3. 2 degradation scheme for  $\beta$ -caryophyllene," *Atmospheric Chemistry and Physics*, vol. 12, no. 11, pp. 5275–5308, 2012.
- [3] G. M. Lanza fame, B. Bessagnet, D. Srivastava, J. L. Jaffrezo, O. Favez, A. Albinet, and F. Couvidat, "Modelling aerosol molecular markers in a 3d air quality model: Focus on anthropogenic organic markers," *Science of The Total Environment*, p. 155360, 2022.
- [4] Y. Kim, L. Lugon, A. Maison, T. Sarica, Y. Roustan, M. Valari, Y. Zhang, M. André, and K. Sartelet, "MUNICH v2.0: A street-network model coupled with SSH-aerosol (v1.2) for multi-pollutant modelling," *Geoscientific Model Development Discussion*, p. accepted, 2022.
- [5] C. Lin, Y. Wang, R. Ooka, C. Flageul, Y. Kim, H. Kikumoto, Z. Wang, and K. Sartelet, "Modelling of street-scale pollutant dispersion by coupled simulation of chemical reaction, aerosol dynamics, and CFD," *Atmospheric Chemistry and Physics Discussion*, p. in review, 2022.
- [6] G. Yarwood, S. Rao, M. Yocke, and G. Whitten, "Updates to the carbon bond chemical mechanism: CB05 Final report to the US EPA, RT-0400675," 2005.
- [7] F. Couvidat and K. Sartelet, "The secondary organic aerosol processor (soap v1. 0) model: a unified model with different ranges of complexity based on the molecular surrogate approach," *Geoscientific Model Development*, vol. 8, no. 4, pp. 1111–1138, 2015.
