# Supplementary material for: GENerator of reduced Organic Aerosol mechanism (GENOA v1.0): an automatic generation tool of semi-explicit mechanisms
Source: Copernicus journal article supplement (doi:10.5194/gmd-15-8957-2022), 2022-12-14
Supplement: Supplementary file 3 [file gmd-15-8957-2022-supplement.zip]

Archive with 4 entries (4 files):
- User-chosen reduction options and parameters.xlsx
- gmd-15-8957-2022-supplement-title-page.pdf
- GENOAv1_user_manual.pdf
- Properties of condensables in _Rdc._ mechanism.xlsx
