# Supplementary material for: GENerator of reduced Organic Aerosol mechanism (GENOA v1.0): an automatic generation tool of semi-explicit mechanisms
Source: Copernicus journal article supplement (doi:10.5194/gmd-15-8957-2022), 2022-12-14
Supplement: Supplementary file 3 [file User-chosen reduction options and parameters.xlsx]

## Sheet: options
Category	notion (if mentioned in the paper)	Meaning of user-chosen reduction parameters and options	Threshold	Comments
reduction evaluation	\epsilon_{ref}	the maximum error compared to the reference mechanism under training conditions	<= 1\% to 10\%
reduction evaluation	\epsilon_{pre}	the maximum error compared to the previous validated mechanism under training conditions	<= 1\% to 10\%
reduction evaluation	\epsilon^{ave}_{pre-testing}	the maximum error compared to the reference mechanism under pre-testing conditions	<= 3\%
reduction evaluation	\epsilon^{max}_{pre-testing}	the maximum error compared to the reference mechanism under pre-testing conditions	<= 25\%
reduction evaluation		reduction error calculation method	see paper
reduction strategy		searching order in species/reaction lists	high-to-low generation
reduction strategy		type \& order of applied reduction strategies	see paper
removing reactions	B_{rm}	Maximum hourly branching ratio of the reaction	<= 5\% to 100\%
jumping		carbon number difference	<= 3
jumping		minimum P_{sat} of species considered to be jumped	0 x10 ^{-6} atm
lumping		order of species list: find lumping for condensables	order by P_{sat}
lumping		weighting ratio f_w calculation method	based on reference concentration and lifetime (see paper)
lumping		functional group check I: restrict to species with same groups	peroxyacetyl nitrates (PAN), organic nitrates (RONO2), organic radicals (R), oxy radicals (RO), peroxy radicals (RO_2), carboxylic acids (RC(O)OH), percarboxylic acids (RC(O)OOH)
lumping		functional group check II: do not participate lumping	biradicals (ROO)
lumping		mass difference	<= 100 g mol^{-1}
lumping		lifetime difference	<= 10-fold
lumping		carbon number difference	<= 2
lumping		Difference in saturation vapor pressure on the logarithmic scale	not used	Not used for BCARY reduction, but can be beneficial for other SOA precursors
replacing		lumping & weighting ratio threshold by which a species is considered to be replaced by another & <= 0
replacing		Minimum mass of species participating in replacing	> 100
replacing		carbon number difference	<= 3
aerosol-oriented treatment		number of condensables to activate aerosol-oriented treatments	<= 20
0-D simulation		simulation starting times	0 h & 12 h
